# Supplementary material for: Environmentally friendly, scalable exfoliation for few-layered hexagonal boron nitride nanosheets (BNNSs) by multi-time thermal expansion based on released gases
Source: Royal Society of Chemistry journal article supplement (doi:10.1039/c9tc03985f), 2019-01-01
Supplement: c9tc03985f1.pdf [file c9tc03985f1.pdf]

## Supporting Information

Environment-friendly, scalable exfoliation for few-layered hexagonal boron nitride nanosheets (BNNSs) by multi-times thermal expansion based on releasing gases

Zhi-lin Cheng\*, Zhan-sheng Ma, Hong-liang Ding, Zan Liu

(School of Chemistry and Chemical Engineering, Yangzhou University, Yangzhou  
225002, China)

Email: zlcheng224@126.com

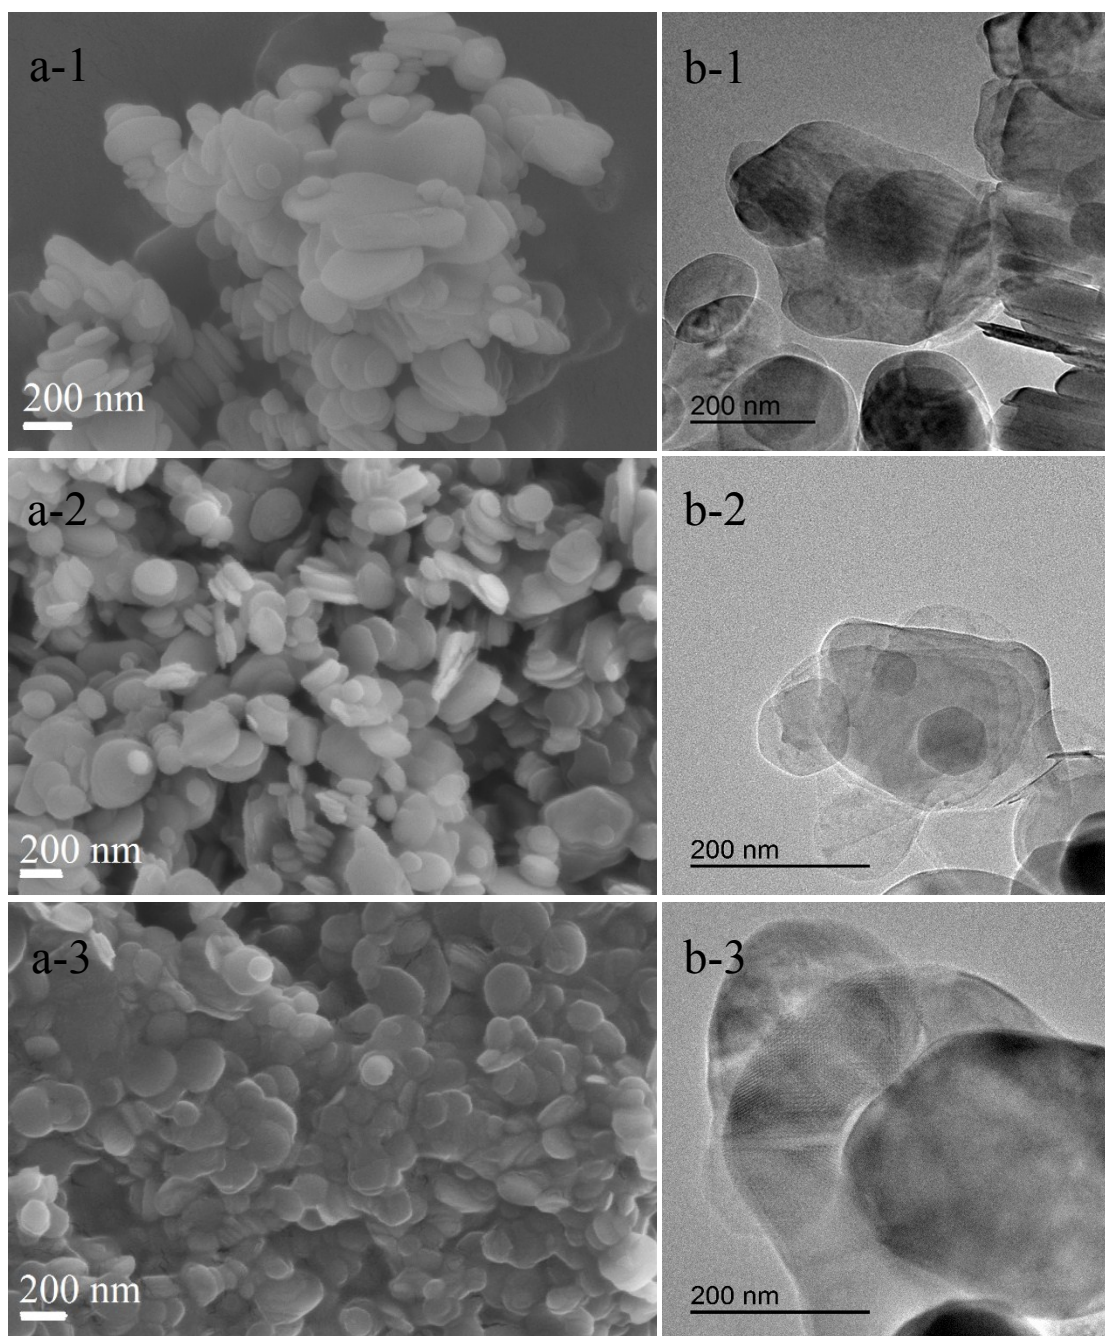

Figure S1. SEM (a) and TEM (b) images of bulk h-BN, the BNNSs-1 and BNNSs-2.

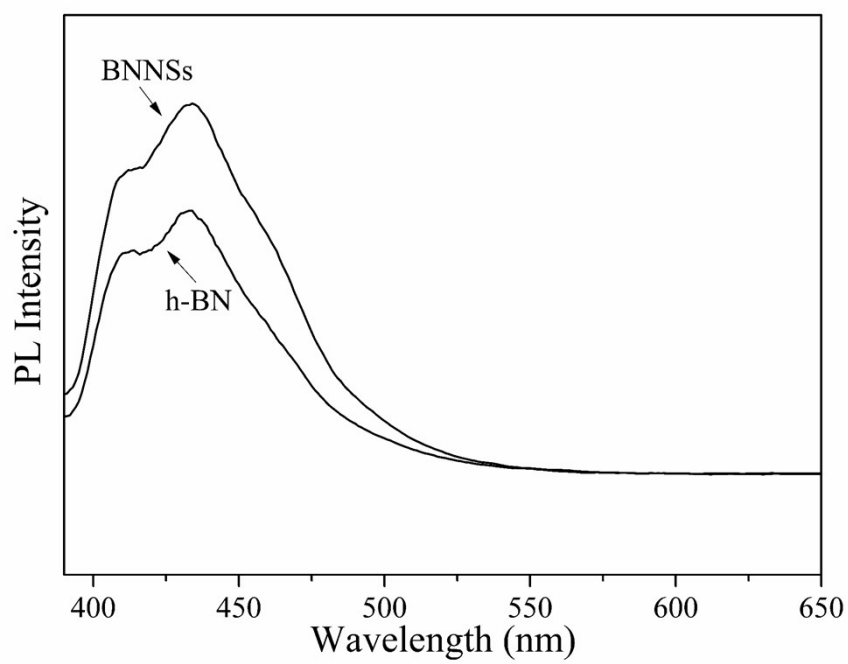

Figure S2. The photoluminescence (PL) spectra of h-BN and the BNNSs-3.

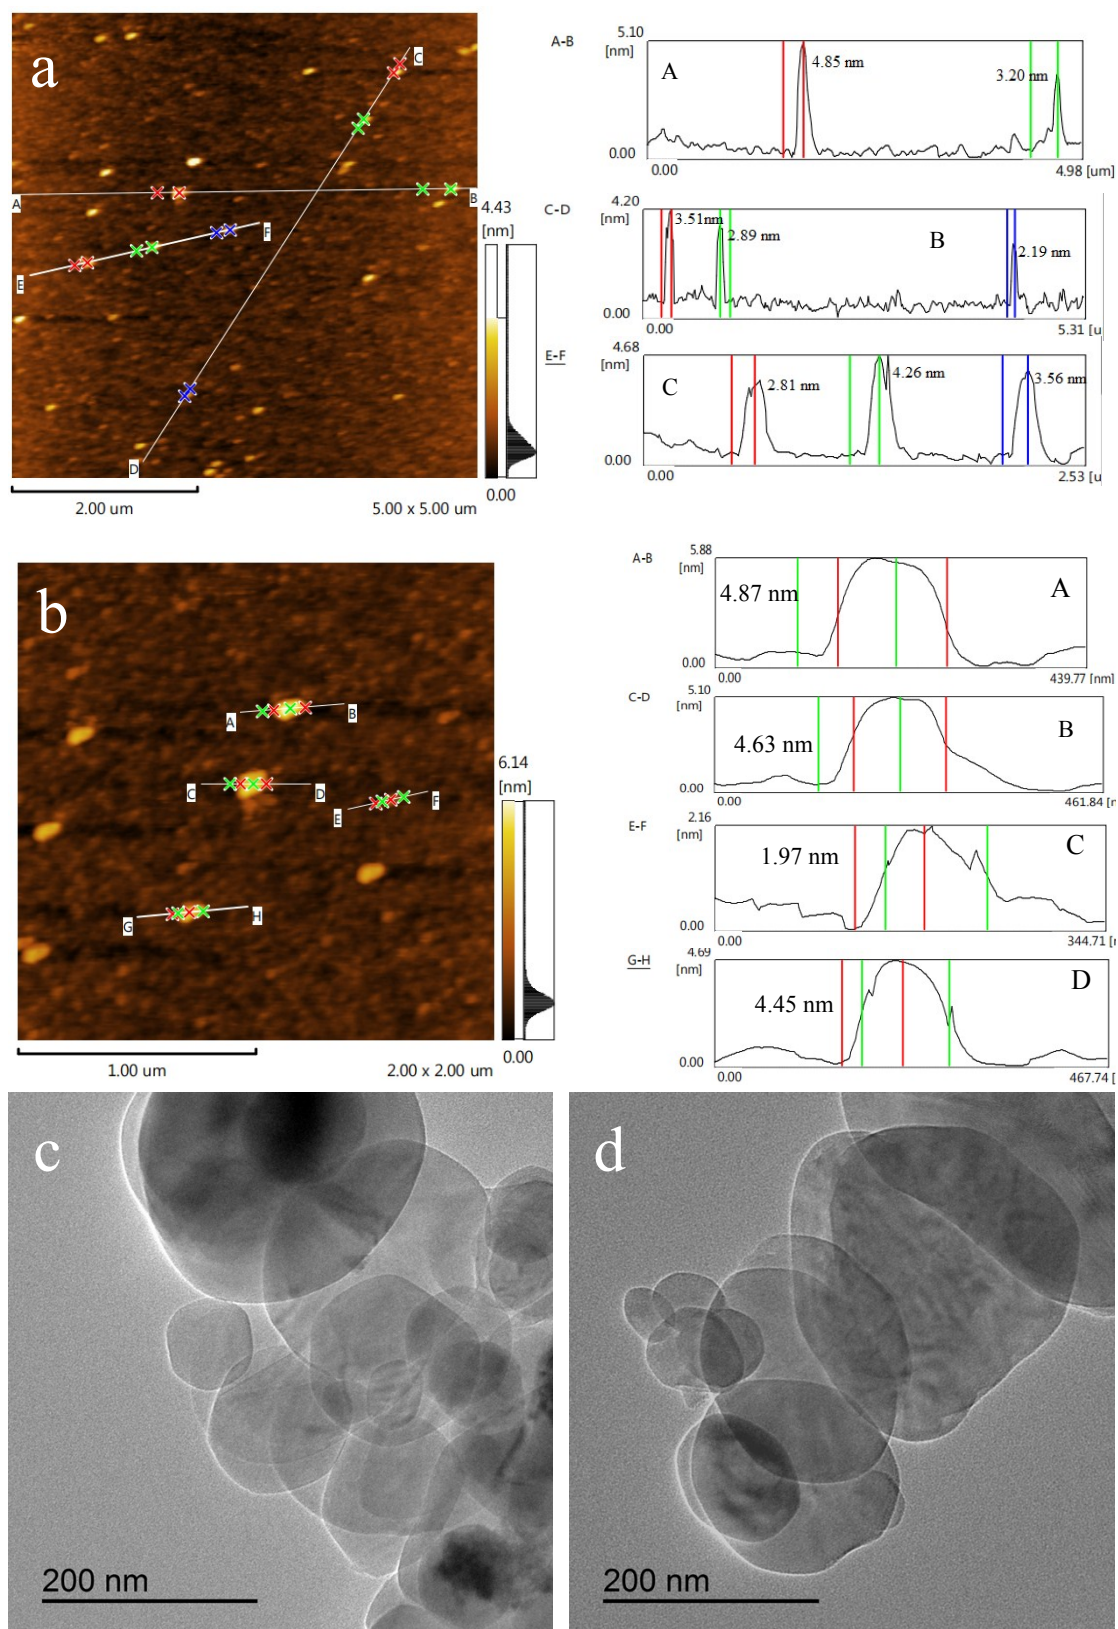

Figure S3. Statistical analysis of the thickness and lateral size of the BNNs-3 measured from AFM images (a, b) and TEM images (c, d).

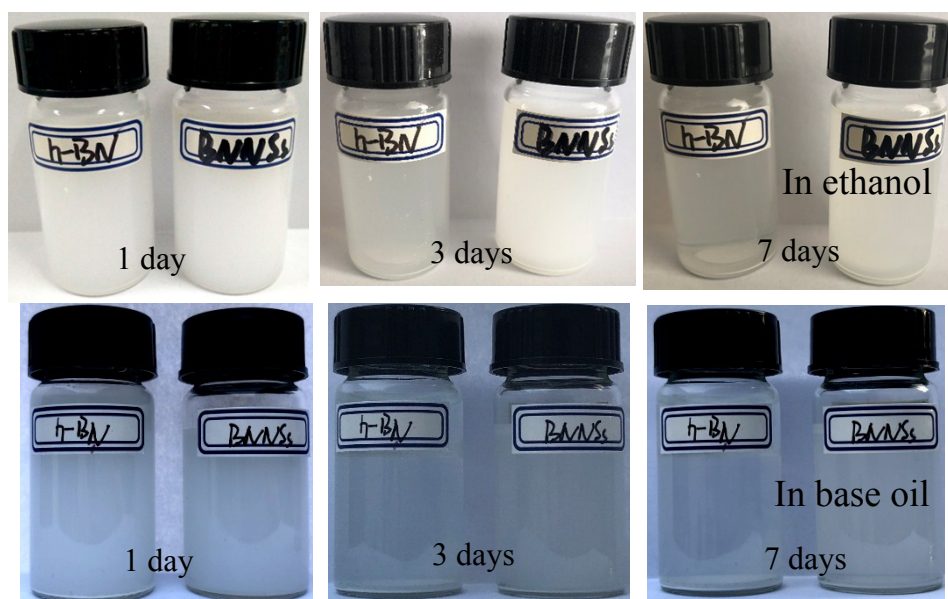

Figure S4. The dispersion photos of h-BN and the BNNSs-3 in ethanol and base oil along with settling time (Initial concentration of the BNNSs-3 and h-BN: 0.4 mg/mL).

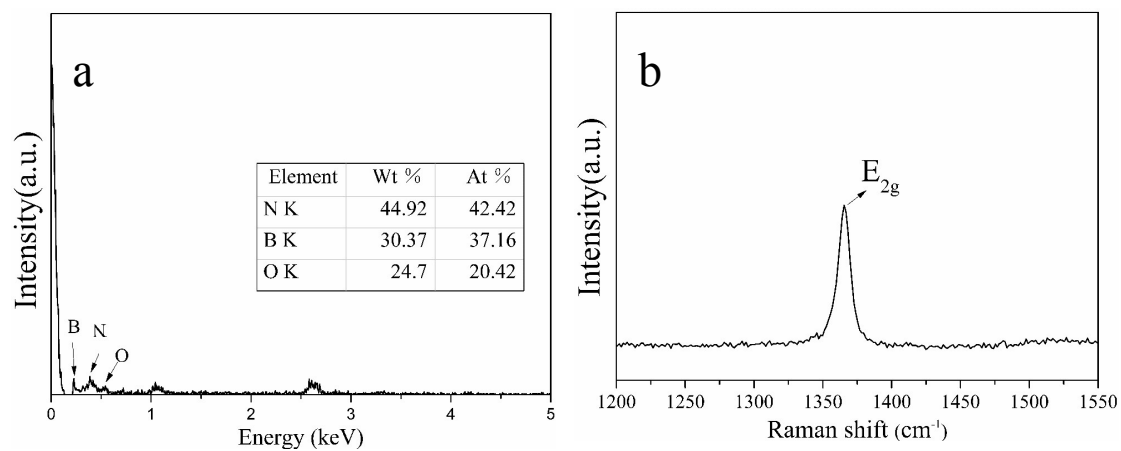

Figure S5. The EDS (a) and Raman spectra (b) of worn steel ball tested by 0.06 wt% BNNSs-based oil.



Table S1 The concentration and stability of the BN solvent described in the literature

| Initial Concentration | Method                   | Stability                      | Ref.      |
|-----------------------|--------------------------|--------------------------------|-----------|
| 30mg/ml               | High energy ball mill    | Hydrogel after 2 weeks         | [38]      |
| 0.1 mg/ml             | Ultrasound               | Lots of sediment after 4 weeks | [23]      |
| 0.2 mg/ml             | Liquid-phase exfoliation | 0.2 mg/ml after 2 hours        | [53]      |
| 0.2 mg/ml             | Liquid-phase exfoliation | Lots of sediment after 2 hours | [53]      |
| 0.4 mg/ml             | Thermal expansion        | 0.07 mg/ml after 1 week        | This work |
